# Supplementary material for: Characterization and structure-activity relationships of indenoisoquinoline-derived topoisomerase I inhibitors in unsilencing the dormant Ube3a gene associated with Angelman syndrome
Source: Springer Nature journal article supplement (doi:10.1186/s13229-018-0228-2), 2018-08-17

Supplementary information 2

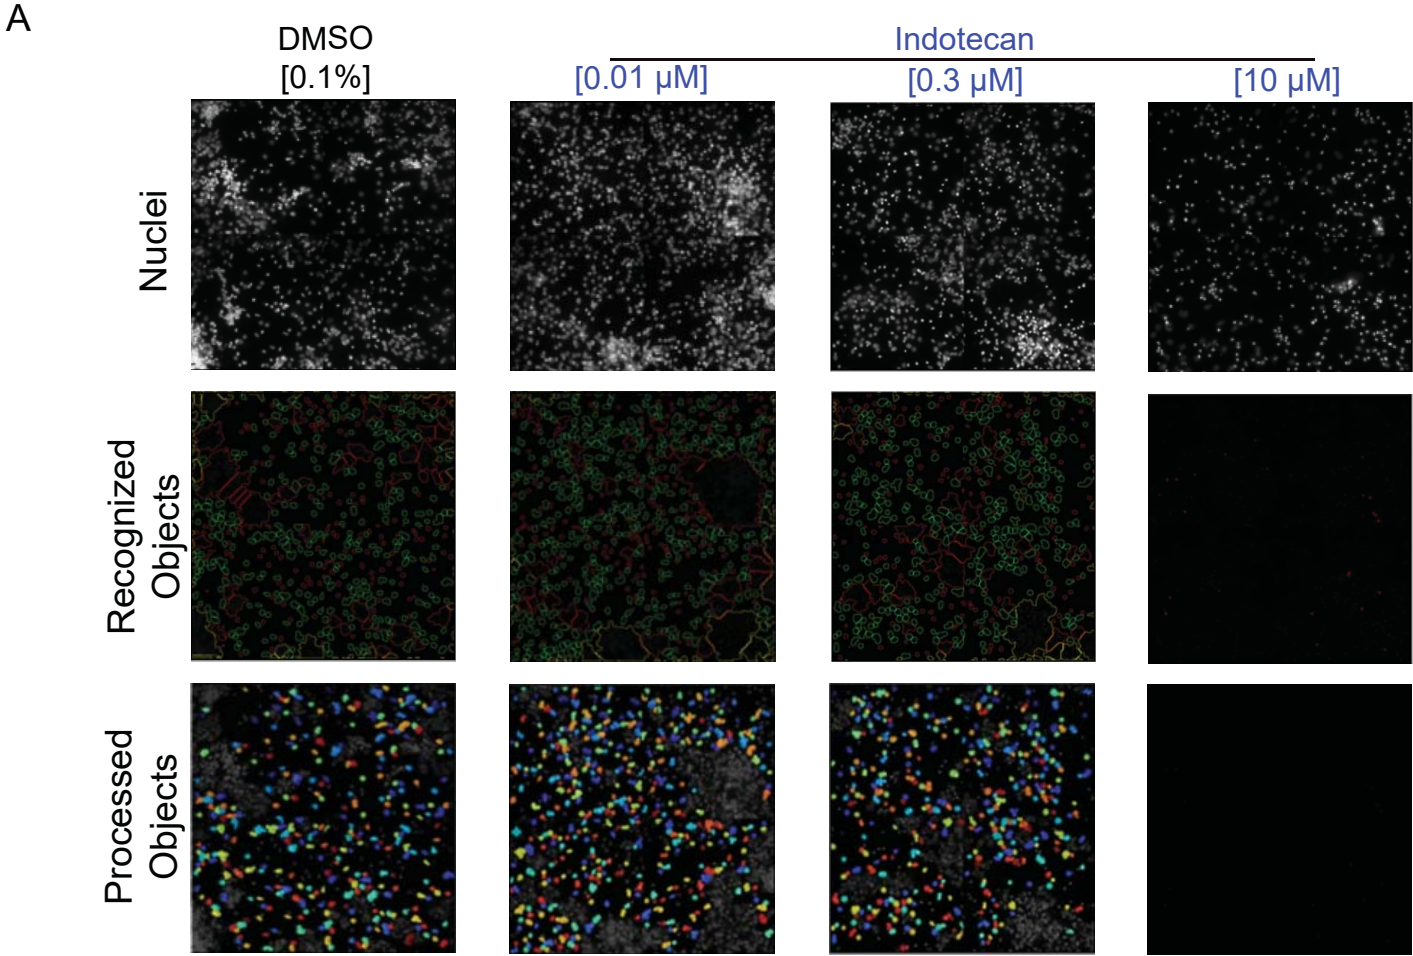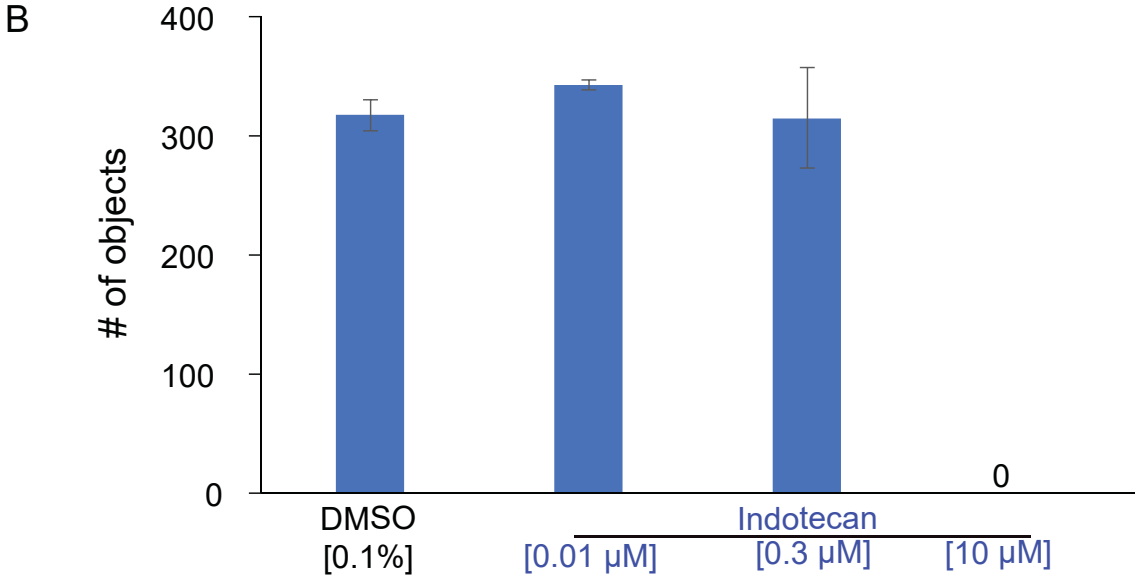

Supplement: MOESM3 [file 16052210]
